# Supplementary material for: Balancing reaction-diffusion network for cell polarization pattern with stability and asymmetry
Source: eLife journal article supplement (doi:10.7554/elife.96421), 2024-06-21
Supplement: code1 [file C. elegans Wild-Type 5-Node Network.xlsx]

## Sheet: Network Parameter
	A	P	C	L	H
	a/1/2.748e-5/0.039/0.039	p/1/1.472e-5/0.039/0.039	a/1/2.748e-5/0.039/0.039	p/1/1.472e-5/0.039/0.039	p/1/1.472e-5/0.039/0.039
A	1.55/0/2/1.55/0/2	1.55/0/2/1.55/1/2	1.55/0.05/2/1.55/0/2	1.55/0/2/1.55/1/2	1.55/0/2/1.55/1/2
P	1.55/0/2/1.55/1/2	1.55/0/2/1.55/0/2	1.55/0/2/1.55/1/2	1.55/0/2/1.55/0/2	1.55/0/2/1.55/0/2
C	1.55/0.05/2/1.55/0/2	1.55/0/2/1.55/1/2	1.55/0/2/1.55/0/2	1.55/0/2/1.55/0/2	1.55/0/2/1.55/1/2
L	1.55/0/2/1.55/1/2	1.55/0/2/1.55/0/2	1.55/0/2/1.55/0/2	1.55/0/2/1.55/0/2	1.55/0/2/1.55/0/2
H	1.55/0/2/1.55/1/2	1.55/0/2/1.55/0/2	1.55/0/2/1.55/1/2	1.55/0/2/1.55/0/2	1.55/0/2/1.55/0/2
