# Supplementary material for: Balancing reaction-diffusion network for cell polarization pattern with stability and asymmetry
Source: eLife journal article supplement (doi:10.7554/elife.96421), 2024-06-21
Supplement: code1 [file Simple Antagonistic 2-Node Network.xlsx]

## Sheet: Network Parameter
	A	P
	a/1/2.748e-5/0.05/0.05	p/1/1.472e-5/0.05/0.05
A	0.05/0/2/0.05/0/2	0.05/0/2/0.05/1/2
P	0.05/0/2/0.05/1/2	0.05/0/2/0.05/0/2
