# Supplementary material for: Balancing reaction-diffusion network for cell polarization pattern with stability and asymmetry
Source: eLife. 2025 Jul 22;13:RP96421. doi: 10.7554/eLife.96421 (PMC12283076; doi:10.7554/eLife.96421)
Supplement: Supplementary file 1. [file elife-96421-supp1.xlsx]

## Sheet: Table S2
Item	Regulator	Substrate	Effect	Reference	Description from Original Literature
Biochemical Activity of Partitioning-Defective Protein
1	PAR-6	CDC-42	Activation	[1][2][3][4]	"PAR-6/PKC-3 can also bind active CDC-42 through the conserved semi-CRIB domain of PAR-6." [4]
2	PKC-3	CDC-42	Inhibition	[5]	"PKC-3 is likely to act at the step of CDC-42 complex generation, either inhibiting its own association with CDC-42, and/or destabilizing nascent CDC-42/PAR-6/PKC-3 assemblies." [5]
3	CDC-42	PAR-6/PKC-3	Activation	[1][3][4][5][6][7][8][9]	"CDC-42 recruits PAR-6, which in turn recruits PKC-3." [3]
4	PAR-3	PAR-6/PKC-3	Pleiotropic	[4][5][10][11]	"Cortical PAR-3 somehow gates the local association of PAR-6/PKC-3 with active CDC-42." [4]; "PAR-3 recuits PKC-3, promotes its membrane targeting while at the same time limiting its activation." [5]; "Both active CDC-42 and PAR-3 bind PAR-6/PKC-3, and both are required for cortical recruitment of PAR-6/PKC-3." [11]
5	PAR-6	PKC-3	Pleiotropic	[5][10][12]	"PAR-6 and PKC-3 depend on each other for membrane association." [5]; "aPKC activity is almost entirely suppressed by its association with PAR-6, but this suppression is partially relieved by CDC42." [12]
6	PKC-3	PAR-3	Inhibition	[3][4][7][13]	"PAR-3, CDC-42 and PAR-6/aPKC can form a quaternary complex, PAR-3 can bind and inhibit the active form of aPKC, and this inhibitory bond can be released by inducing phosphorylation of PAR-3 by aPKC." "One possible scenario is that PAR-6/aPKC dock initially on PAR-3, followed by formation of a quaternary complex, and then phosphorylation of PAR-3 by aPKC releases CDC-42/PAR-6/aPKC." [4]
7	PKC-3	PAR-6	Activation	[4][5]	"PAR-6 and PKC-3 depend on each other for membrane association." [5]
8	PAR-2	PAR-1	Activation	[4][5][14]	"PAR-2 recruits PAR-1 by binding to the C terminus of PAR-1 and contributes to recruiting PAR-1 during polarity maintenance." [12,15]
9	PAR-6/PKC-3	CHIN-1	Inhibition	[4][5][11][15]	"PAR-6/PKC-3 also restrict local accumulation of CHIN-1 clusters to the posterior pole." [4]
10	PAR-6/PKC-3	PAR-1	Inhibition	[4][11]	"PAR-6/PKC-3 inhibit local accumulation of PAR-1 and CHIN-1 clusters." [11]
11	PKC-3	PAR-1	Inhibition	[3][4][5][7][11][12]	"The phosphorylation of PAR-1 by aPKC permits binding of PAR-5, which both inhibits the PAR-1 kinase activity and blocks membrane binding." [12]
12	PKC-3	PAR-2	Inhibition	[3][4][5][7][9][13][14]	"Microtubule binding protects PAR-2 from aPKC phosphorylation and allows PAR-2 to interact with phospholipids in the presence of aPKC." [14]
13	PKC-3	LGL-1	Inhibition	[2][3][4][5][7][9][13][16]	"PKC-3 phosphorylates LGL-1 and displaces them from the anterior membrane." [5]
14	CDC-42	PAR-2	Inhibition	[17]	"PAR-2 requires CDC-42 for exclusion from the anterior." [17]
15	CDC-42	CHIN-1	Inhibition	[4][6][11]	"Active CDC-42 recruits PAR-6/PKC-3, which locally inhibits the accumulation of CHIN-1 clusters." [4]
16	PAR-1	PAR-3	Inhibition	[3][4][5][7][12][14]	"PAR-1 phosphorylates PAR-3 and inhibits membrane association and/or oligomerization." "Depletion of PAR-1 causes weak posterior accumulation of PAR-3 clusters." [4]
17	PAR-1	PAR-6/PKC-3	Inhibition	[4][11][14][18]	"Depletion of PAR-1 causes a slight increase in posterior association of PAR-6/PKC-3." [4]
18	PAR-2	PAR-3	Inhibition	[3][7][9][13]	"Cortical PAR-2 can exclude PAR-3 from the cortex and that this activity does not require the RING." [13]
19	PAR-2	PAR-6/PKC-3	Inhibition	[2][4][6][17]	"PAR-2 does not act by promoting posterior dissociation of PAR-6/PKC-3." [4]; "PAR-2 negatively regulates the size of the cortical PAR-6 domain, but not the steady state level of PAR-6." [6]
20	PAR-2	CDC-42	Inhibition	[1][11][15][17]	"PAR-2 is necessary to exclude activated CDC-42 from the posterior." [17]
21	LGL-1	PKC-3	Inhibition	[2][3][4][6][7]	"LGL is found associated with the anterior PAR complex proteins PAR-6 and PKC-3 by immunoprecipitation." [2]
22	LGL-1	PAR-3	Inhibition	[4][7][18]	"LGL-1 involves its ability to displace PAR-3 from the PAR-3/PAR-6/PKC-3 complexes." [7]
23	LGL-1	PAR-6	Inhibition	[2][4][6][16]	"LGL is found associated with the anterior PAR complex proteins PAR-6 and PKC-3 by immunoprecipitation." [2]
24	CHIN-1	PAR-3/PAR-6/PKC-3	Inhibition	[4][6][11][19]	"Depletion of both PAR-1 and CHIN-1 leads to uniform CDC-42 activation and weak posterior accumulation of PAR-3 clusters, and this is accompanied by rapid posterior association of PAR-6/PKC-3 and complete loss of PAR-6/PKC-3 asymmetry." [4]
25	CHIN-1	CDC-42	Inhibition	[4][6][9][11][15]	"CHIN-1 inactivates CDC-42. Spatial restriction of CDC-42 activity during maintenance phase depends on its local inhibition by CHIN-1." [4]
Note 1 (Underline)
The items underlined are the internal reactions of the PAR-3/PAR-6/PKC-3 complex and PAR-1/PAR-2 complex.
Note 2 (Background Color)
	Anterior Activity
	Posterior Activity
	Interaction between Anterior and Posterior Activities
Note 3 (Description from Original Literature for Complex Reaction)
Items 3, 4, 6: "PAR-3, CDC-42 and PAR-6/aPKC can form a quaternary complex. PAR-3 can bind and inhibit the active form of aPKC, and this inhibitory bond can be released by inducing phosphorylation of PAR-3 by aPKC." [4]
Items 4, 12, 20, 22: "LGL on the cortex binds the PAR complex most likely at the boundary between the anterior PAR domain and the posterior LGL domain, forming the PAR-6/PKC-3/LGL complex. PKC-3 will then phosphorylate LGL, and the whole complex will drop off the cortex." [2]
Items 4, 18, 20: "PAR-3, LGL and likely PAR-2 can act as stoichiometric inhibitors of PKC-3." [4]
References
[1] Aceto D, Beers M, Kemphues KJ. Interaction of PAR-6 with CDC-42 is required for maintenance but not establishment of PAR asymmetry in C. elegans. Dev Biol 2006;299:386-97.
[2] Hoege C, Constantinescu A, Schwager A, et al. LGL can partition the cortex of one-cell Caenorhabditis elegans embryos into two domains. Curr Biol 2010;20:1296-303.
[3] Hoege C, Hyman AA. Principles of PAR polarity in Caenorhabditis elegans embryos. Nat Rev Mol Cell Biol 2013;14:315-22.
[4] Lang CF, Munro E. The PAR proteins: from molecular circuits to dynamic self-stabilizing cell polarity. Development 2017;144:3405-16.
[5] Rodriguez J, Peglion F, Martin J, et al. aPKC cycles between functionally distinct PAR protein assemblies to drive cell polarity. Dev Cell 2017;42:400-15.
[6] Beatty A, Morton DG, Kemphues K. PAR-2, LGL-1 and the CDC-42 GAP CHIN-1 act in distinct pathways to maintain polarity in the C. elegans embryo. Development 2013;140:2005-14.
[7] Goehring NW. PAR polarity: From complexity to design principles. Exp Cell Res 2014;328:258-66.
[8] Gotta M, Abraham MC, Ahringer J. CDC-42 controls early cell polarity and spindle orientation in C. elegans. Curr Biol 2001;11:482-8.
[9] Rose L, Gönczy P. Polarity establishment, asymmetric division and segregation of fate determinants in early C. elegans embryos. WormBook 2014;1-43.
[10] Li J, Kim H, Aceto D, et al. Binding to PKC-3, but not to PAR-3 or to a conventional PDZ domain ligand, is required for PAR-6 function in C. elegans. Dev Biol 2010;340:88-98.
[11] Sailer A, Anneken A, Li Y, et al. Dynamic opposition of clustered proteins stabilizes cortical polarity in the C. elegans zygote. Dev Cell 2015;35:131-42.
[12] Goldstein B, Macara IG. The PAR proteins: fundamental players in animal cell polarization. Dev Cell 2007;13:609-22.
[13] Hao Y, Boyd L, Seydoux G. Stabilization of cell polarity by the C. elegans RING protein PAR-2. Dev Cell 2006;10:199-208.
[14] Motegi F, Zonies S, Hao Y, et al. Microtubules induce self-organization of polarized PAR domains in Caenorhabditis elegans zygotes. Nat Cell Biol 2011;13:1361-7.
[15] Kumfer KT, Cook SJ, Squirrell JM, et al. CGEF-1 and CHIN-1 regulate CDC-42 activity during asymmetric division in the Caenorhabditis elegans embryo. Mol Biol Cell 2010;21:266-77.
[16] Beatty A, Morton D, Kemphues K. The C. elegans homolog of Drosophila Lethal giant larvae functions redundantly with PAR-2 to maintain polarity in the early embryo. Development 2010;137:3995-4004.
[17] Small LE, Dawes AT. PAR proteins regulate maintenance-phase myosin dynamics during Caenorhabditis elegans zygote polarization. Mol Biol Cell 2017;1:2220-31.
[18] Motegi F, Seydoux G. The PAR network: redundancy and robustness in a symmetry-breaking system. Philos Trans R Soc Lond B Biol Sci 2013;368:20130010.
[19] Cuenca AA, Schetter A, Aceto D, et al. Polarization of the C. elegans zygote proceeds via distinct establishment and maintenance phases. Development 2003;130:1255-65.
